# Supplementary material
Source: publisher figshare collection journal article supplement (https://acs.figshare.com/ndownloader/files/13376027)
Supplement: Supplementary file 1 [file 13376027]

## Supporting Information

### **A Micro-Centrifugal Technique for Improved Assessment and Optimization of Nanomaterial Dispersions: The Case for Carbon Nanotubes**

Simon G King<sup>1</sup>, Evandro Castaldelli<sup>2</sup>, Liam McCafferty<sup>1</sup>, S Ravi P Silva<sup>1</sup>, Vlad Stolojan<sup>1\*</sup>

<sup>1</sup>Advanced Technology Institute, University of Surrey, GU2 7XH

<sup>2</sup>Departamento de Química, FFCLRP, Universidade de São Paulo, Av. Bandeirantes 3900 CEP 14040-901, Ribeirão Preto, SP, Brazil

\*Corresponding author. Tel: +44 (0)1483 689411 Email: [v.stolojan@surrey.ac.uk](mailto:v.stolojan@surrey.ac.uk) (Vlad Stolojan)

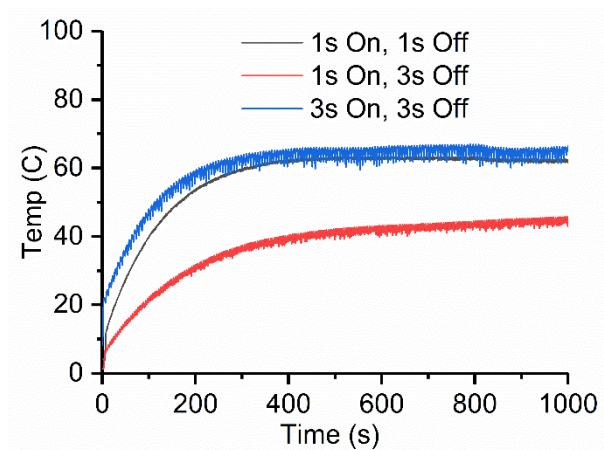

**Figure S1 – The heating effect of the ultrasonic horn when in pulse-mode was probed to ensure solvent heating was not approaching boiling point during operation. For this test 15 mL of water was subject to ultrasonic agitation at 40 W/mL (80% power), the highest output used in this study, for the specified pulse intervals. The temperature of the water was monitored with a thermocouple. As the data shows the water temperature did not exceed 65 °C for the 3sec on, 3sec off chosen for the study. Should a more volatile solvent be used such as ethanol, we recommend a pulsed interval of 1sec on, 3sec off, as this kept the solution around 40 °C.**

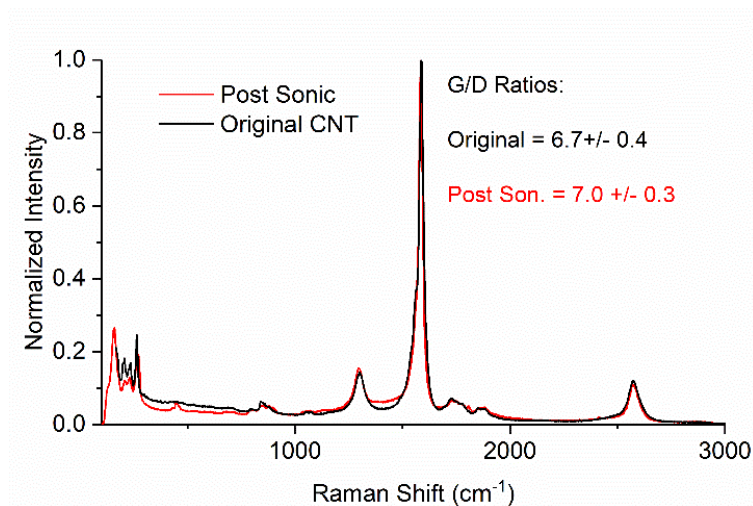

**Figure S2 – The Raman spectra obtained from the CNTs before and after ultrasonication has been applied. Comparing the two spectra revealed that the CNTs were not damaged as a result of the sonication application through a D/G ratio that does not increase.**

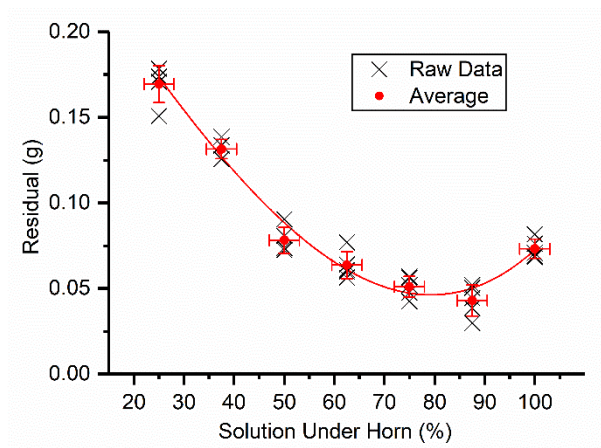

**Figure S3 – The raw data set used for the horn depth investigation, showing the five measurements that were averaged for each horn depth. The line is a best fit to the mean value at each horn depth.**
